# Supplementary material
Source: HighWire-hosted journal article supplement (doi:10.1101/rna.079347.122)
Supplement: Supplemental_Table_S1.docx [file Supplemental_Table_S1.docx]

**Supplemental_Table_S1. Primers for cloning and in vitro transcription**

| **Construct name** | **Primer name** | **Primer sequence (5**´**-3**´**)** |
| --- | --- | --- |
| NCp15 | NCp15 NcoI F | TATACCATGGGCATACAGAAAGG CAATTTTAGGAACCAAAGAAAGAC |
|  | NCp15 XhoI R | CCGCTCGAGTTGTGACGAGGGGT CGCTGC |
| WM-Gag | WM-Gag Mut F | ACAAGAGGTAAAAAATGCAGCAA CAGAAACCTTGTTGGTCCAAAATG |
|  | WM-Gag Mut R | CAAGGTTTCTGTTGCTGCATTTTT TACCTCTTGTGAAGCTTGC |
| 5´UTRΔPBS | PBS Mut F | GTGACTCTGGTGAGAGCCAGAGG AGATCTCTCGACGC |
|  | PBS Mut R | CTCCTCTGGCTCTCACCAGAGTC ACACAACAGACGGG |
| 5´UTRΔDIS | DIS Mut F | CTTGCTGGAGACGGCAAGAGGC GAGGGG |
|  | DIS Mut R | CTTGCCGTCTCCAGCAAGCCGAG TCCTGCG |
| 5´LP | T7+5´LP F | TAATACGACTCACTATAGGGTGC CCGTCTGTTGTGTG |
|  | 5´LP 344 R | GGCACCCATCTCTCTCCTTCTAG  C |
| 5´LT | T7+5´LT F | TAATACGACTCACTATAGGGTCCC CGTCTGTTGTGTG |
|  | 5´LT 325 R | CTAGCCTCCGCTAGTCAAAATTTT  TG |
| 5´LP-handle | T7+handle F | TAATACGACTCACTATAGGGTTGG AGGTTATGGAGCAG |
